# Supplementary material
Source: publisher figshare collection journal article supplement (https://sage.figshare.com/ndownloader/files/18531167)
Supplement: Supplementary file 1 [file 18531167]

## Reference list of the instruments included in Table 1

- Anderson-Butcher D, Iachini AL and Amorose AJ (2008) Initial reliability and validity of the perceived social competence scale. *Research on Social Work Practice* 18(1): 47-54.
- Anderson-Butcher D, Ball A, Medalen T, et al. (2010) Mobile Learning Institute: Adoption of Innovation Key Findings and Conclusions. Ohio State University.
- Arnold ME, Nott BD and Meinhold JL (2012) *The Positive Youth Development Inventory*. Corvallis, OR: Oregon State University.
- Austin S and Joseph S (1996) Assessment of bully/victim problems in 8 to 11-year-olds. *British Journal of Educational Psychology* 66(4): 447-456.
- Bandura A (1990) *Multidimensional Scales of Perceived Self-Efficacy*. Palo Alto, CA: Stanford University.
- Benson PL, Leffert N, Scales PC, et al. (1998) Beyond the “village” rhetoric: Creating healthy communities for children and adolescents. *Applied Developmental Science* 2(3): 138–159.
- Bulotaite L and Gudzinskiene V (2003) *Life Skills Education. V – VIII Grades*. Vilnius: Baltijos kopija.
- Byrne DG, Davenport SC and Mazanov J (2007) Profiles of adolescent stress: The development of the adolescent stress questionnaire (ASQ). *Journal of Adolescence* 30(3): 393-416.
- Caprara GV, Steca P, Zelli A, et al. (2005) A new scale for measuring adults' prosocialness. *European Journal of Psychological Assessment* 21(2): 77-89.
- Carron AV, Brawley LR and Widmeyer WN (2002) *The Group Environment Questionnaire: Test Manual*. Morgantown, WV: Fitness Information Technology. Morgantown, WV: Fitness Information Technology.
- Eisenberg N, Fabes RA, Murphy B, et al. (1996) The relations of children's dispositional empathy-related responding to their emotionality, regulation, and social functioning. *Developmental Psychology* 32(2): 195-209.
- Garaigordobil M and Maganto C (2011) Empatía y resolución de conflictos durante la infancia y la adolescencia: Empathy and conflict resolution during infancy and adolescence. *Revista Latinoamericana De Psicología* 43(2): 255-266.
- Goodenow C (1993) The psychological sense of school membership among adolescents: Scale development and educational correlates. *Psychology in the Schools* 30(1): 79-90.
- Goodman R (1997) The Strengths and Difficulties Questionnaire: a research note. *Journal of Child Psychology and Psychiatry* 38(5): 581-586.
- Goudas M, Magotsiou E and Hatzigeorgiadis A (2009) Psychometric properties of the Greek version of the Feelings toward Group Work questionnaire. *European Journal of Psychological Assessment* 25(3): 204-210.
- Gresham FM and Elliott SN (1990) *Social Skills Rating System: Manual*. Circle Pines, MN: American Guidance Service.
- Gresham FM and Elliott SN (2008) *Social Skills Improvement System: Rating Scales Manual*. Minneapolis, MN: Pearson Assessments.

- Guan J, McBride RE and Xiang P (2006) Reliability and validity evidence for the Social Goal Scale-Physical Education (SGS-PE) in high school settings. *Journal of Teaching in Physical Education* 25(2): 226-239.
- Hampel P, Petermann F and Dickow B (2001) *SVF-KJ: Stressverarbeitungsfragebogen Von Janke Und Erd-Mann, Angepasst Für Kinder Und Jugendliche; Manual*. Göttingen; Bern; Toronto; Seattle: WA: Hogrefe.
- Hansen DM and Larson R (2005) *The Youth Experience Survey 2.0: Instrument Revisions and Validity Testing*. University of Illinois at Urbana-Champaign.
- Harter S (1982) The Perceived Competence Scale for Children. *Child Development* 53(1): 87-97.
- Harter S (1985) *Self-Perception Profile for Children*. Denver, CO: University of Denver.
- Harter S (1988) *Manual for the Self-Perception Profile for Adolescents*. Denver, CO: University of Denver.
- Harter S and Pike R (1984) The pictorial scale of perceived competence and social acceptance for young children. *Child Development* 55(6): 1969-1982.
- Harwood C (2008) Developmental consulting in a professional football academy: The 5Cs coaching efficacy program. *The Sport Psychologist* 22(1): 109-133.
- Keyes CL (2006) The subjective well-being of America's youth: Toward a comprehensive assessment. *Adolescent & Family Health* 4(1): 3-11.
- Korkut F (1996) Developing Communication Skills Assessment Scale: Reliability and Validity Studies. *Turkish Psychological Counseling and Guidance Association* 2(7): 18-23.
- Legkauskas V (2000) Relationships among identity statuses and social adaptation at school indices. *Psychology* 22: 54-63.
- Li W, Wright PM, Rukavina PB, et al. (2008) Measuring students' perceptions of personal and social responsibility and the relationship to intrinsic motivation in urban physical education. *Journal of Teaching in Physical Education* 27(2): 167-178.
- Magotsiou E, Goudas M and Hasandra M (2006) Validity and reliability of the Greek version of the Multisource Assessment of Social Competence Scale. *Perceptual and Motor Skills* 103(3): 667-675.
- Mahoney JL and Stattin H (2000) Leisure activities and adolescent antisocial behavior: The role of structure and social context. *Journal of Adolescence* 23(2): 113-127.
- Merrell KW (2002) *School Social Behavior Scales*. Eugene, OR: Assessment-Intervention Resources.
- Michelson L and Wood R (1982) Development and psychometric properties of the Children's Assertive Behavior Scale. *Journal of Behavioral Assessment* 4(1): 3-13.
- Moreno JA, González-Cutre D and Sicilia Á (2007) Metas sociales en las clases de educación física. *Análisis Y Modificación De Conducta* 33(149): 351-368.
- Page J and Thelwell R (2013) The value of social validation in single-case methods in sport and exercise psychology. *Journal of Applied Sport Psychology* 25(1): 61-71.

- Papacharisis V (2004) *Implementation of Life Skills Development Programs in Physical Education and Sports*. PhD thesis, University of Thessaly, Greece.
- Peterson JL and Zill N (1986) Marital disruption, parent-child relationships, and behavior problems in children. *Journal of Marriage and the Family* 48(2): 295-307.
- Polit D (1998) *The Positive Behavior Scale*. Saratoga Springs, NY: Humanalysis.
- Rajgorodskij DJ (2000) *Practical Psychodiagnostics. Handbook of Test Methods*. Samara: Izdatel'skij Dom «BAHRAH».
- Rigby K and Slee PT (1993) Dimensions of interpersonal relation among Australian children and implications for psychological well-being. *The Journal of Social Psychology* 133(1): 33-42.
- Riggio RE (1989) *Manual for the Social Skills Inventory*. Palo Alto, CA: Consulting Psychologists Press.
- Sanchez-Oliva D, Sanchez-Miguel P, Leo F, et al. (2013) Development and validation of a questionnaire to examine perception of positive behaviours in physical education classes. *Cultura Y Educación* 25(4): 495-507.
- Serin O, Bulut Serin N and Saygılı G (2010) İlköğretim düzeyindeki çocuklar için problem çözme envanteri'nin (ÇPÇE) geliştirilmesi. *İlköğretim Online* 9(2): 446-458.
- Silliman B and Schumm WR (2013) Youth program quality survey: Youth assessment of program quality. *Marriage & Family Review* 49(7): 647-670.
- Small S and Rodgers K (1995) Teen Assessment Project. Madison, WI: School of Family Resources and Consumer Sciences, University of Wisconsin.
- Smith RE, Schutz RW, Smoll FL, et al. (1995) Development and validation of a multidimensional measure of sport-specific psychological skills: The Athletic Coping Skills Inventory-28. *Journal of Sport and Exercise Psychology* 17(4): 379-398.
- Snyder CR, Sympson SC, Ybasco FC, et al. (1996) Development and validation of the State Hope Scale. *Journal of Personality and Social Psychology* 70(2): 321-335.
- Vallerand RJ, Brière NM, Blanchard C, et al. (1997) Development and validation of the multidimensional sportspersonship orientations scale. *Journal of Sport and Exercise Psychology* 19(2): 197-206.
- Van Der Vegt, Gerben S, Emans BJ, et al. (2001) Patterns of interdependence in work teams: A two-level investigation of the relations with job and team satisfaction. *Personnel Psychology* 54(1): 51-69.
- Weiss MR, Bolter ND and Kipp LE (2014) Assessing impact of physical activity-based youth development programs: Validation of the Life Skills Transfer Survey (LSTS). *Research Quarterly for Exercise and Sport* 85(3): 263-278.
- Weiss MR, Bredemeier BJ and Shewchuk RM (1985) An intrinsic/extrinsic motivation scale for the youth sport setting: A confirmatory factor analysis. *Journal of Sport Psychology* 7(1): 75-91.
